# Supplementary material
Source: PubMed Central journal article supplement (PMC1061511)

**Patch Clamp**

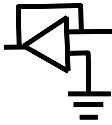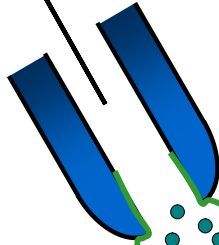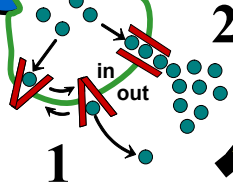

**Amperometry  
+700mV**

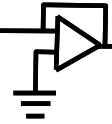

● = DA and/or ion

Supplement: pnas_102_9_3495__2.pdf [file pnas_102_9_3495__2.pdf]

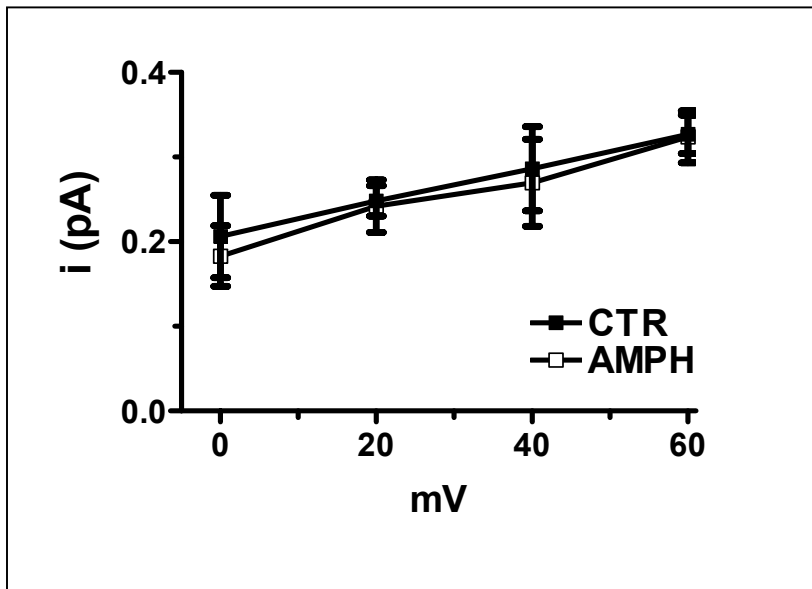

Supplement: pnas_102_9_3495__3.pdf [file pnas_102_9_3495__3.pdf]
